# Supplementary material
Source: PubMed Central journal article supplement (PMC1472428)

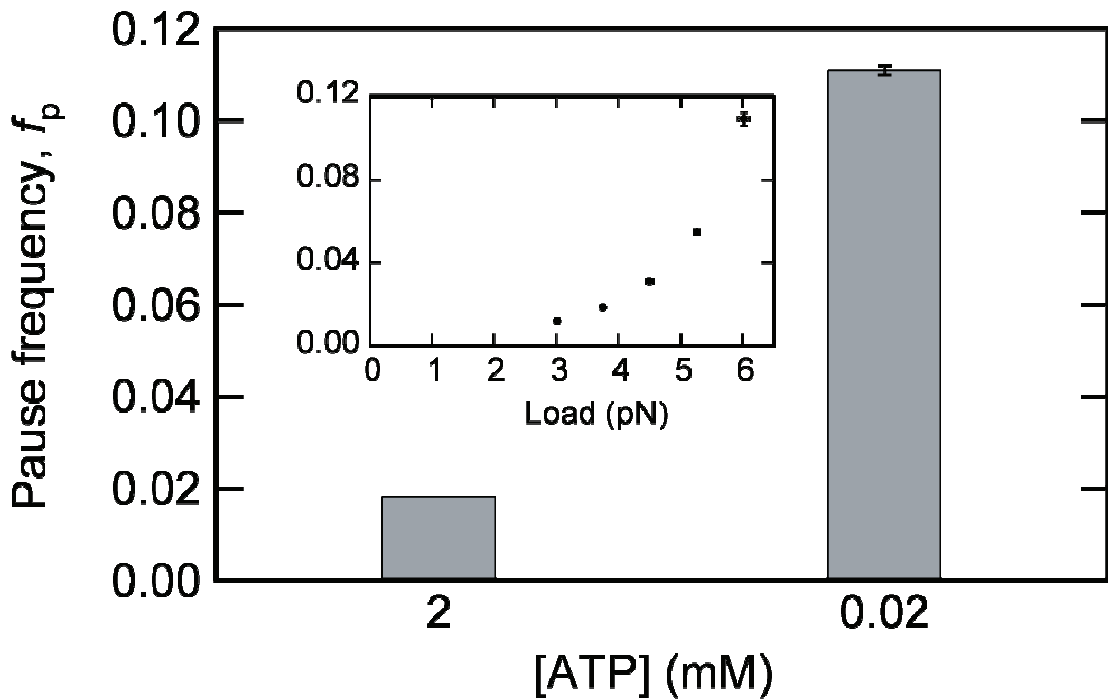

Supplement: pnas_0600931103_1.pdf [file pnas_0600931103_1.pdf]

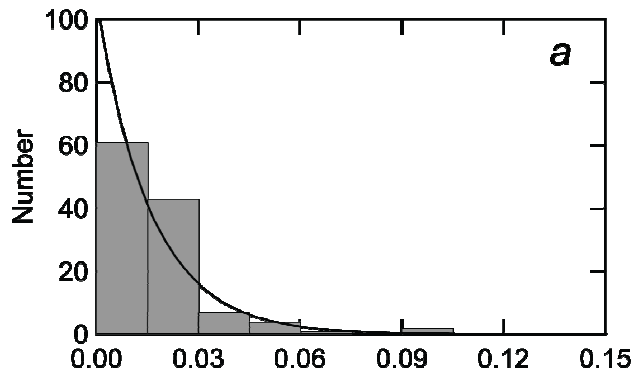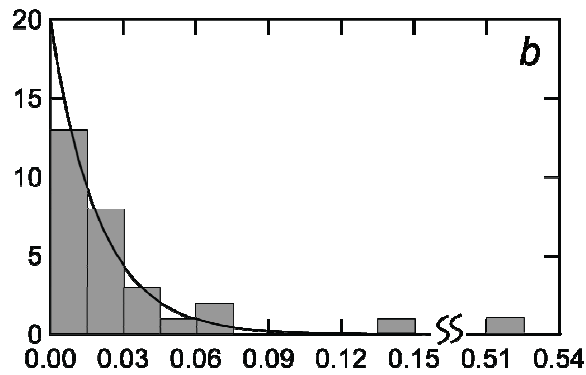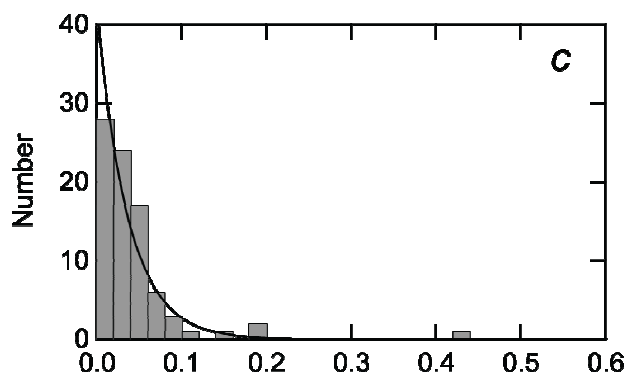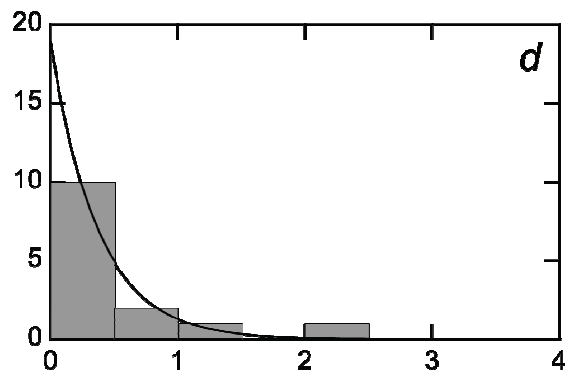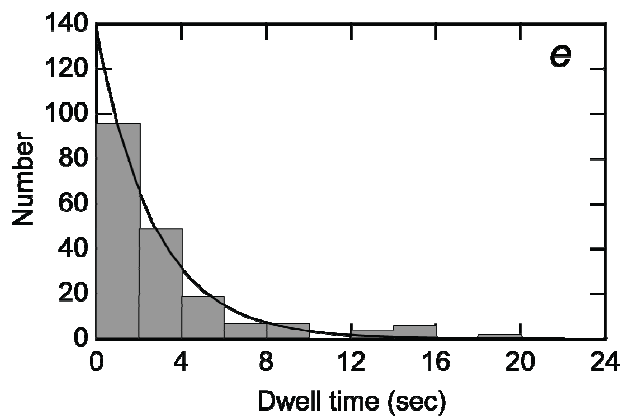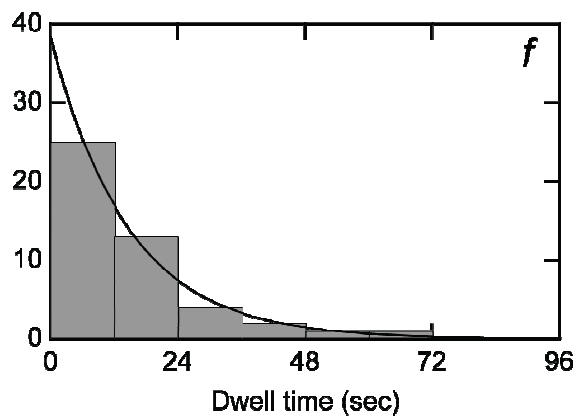

Supplement: pnas_0600931103_2.pdf [file pnas_0600931103_2.pdf]
